# Supplementary material for: Structure-Engineered Core–Shell Ni–Co–O/NiCo-LDH Nanospheres as High-Performance Supercapacitor Electrodes
Source: MDPI journal article supplement (doi:10.3390/coatings13020353), 2023-02-03
Supplement: s1 [file coatings-2144820-supplementary.pdf › coatings-2144820-supplementary.pdf]

# Supplementary Materials: Structure-Engineered Core–Shell Ni–Co–O/NiCo-LDH Nanospheres as High-Performance Supercapacitor Electrodes

Yumei Luo <sup>1,†</sup>, Xu Feng <sup>1,†</sup>, Dan Wei <sup>1</sup>, Lingling Zhang <sup>1</sup>, Qingyong Wang <sup>2,\*</sup>, Fan Yang <sup>3</sup>, Shujun Qiu <sup>1</sup>, Fen Xu <sup>1</sup>, Yongjin Zou <sup>1</sup>, Lixian Sun <sup>1,\*</sup> and Hailiang Chu <sup>1,\*</sup>

<sup>1</sup> Guangxi Key Laboratory of Information Materials, Guilin University of Electronic Technology, Guilin 541004, China; luoym@guet.edu.cn (Y.L.); 20102302014@mails.guet.edu.cn (X.F.); 21102302082@mails.guet.edu.cn (D.W.); 21102302105@mails.guet.edu.cn (L.Z.); qiushujun@guet.edu.cn (S.Q.); xufen@guet.edu.cn (F.X.); zouy@guet.edu.cn (Y.Z.)

<sup>2</sup> Guangxi Key Lab of Wireless Wideband Communication and Signal Processing, School of Information and Communication, Guilin University of Electronic Technology, Guilin 541004, China

<sup>3</sup> College of Chemistry and Materials Science, Weinan Normal University, Shaanxi 714099, China; yf1327953118@163.com

\* Correspondence: wangqy@guet.edu.cn (Q.W.); sunlx@guet.edu.cn (L.S.); chuhailiang@guet.edu.cn (H.C.)

† Yumei Luo and Xu Feng contributed equally to this work.

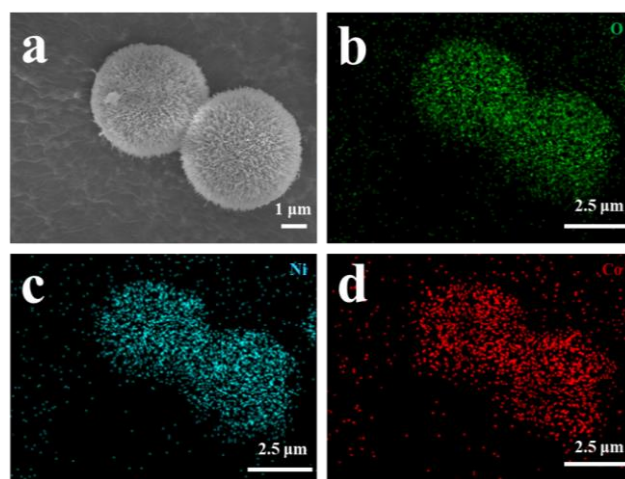

**Figure S1.** SEM (a) and EDS (b–d) images of NiCo-LDH.

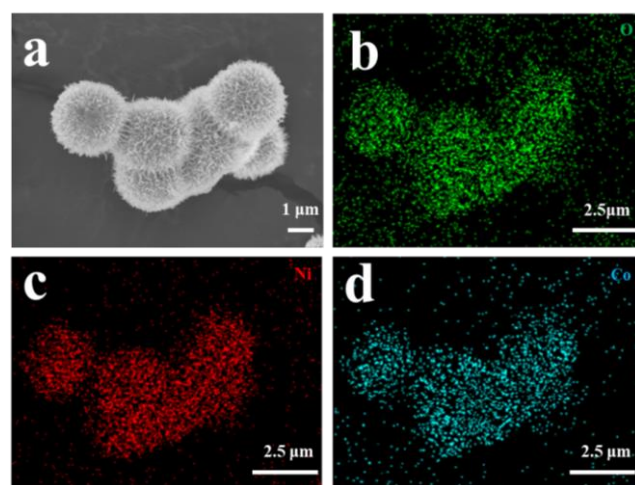

**Figure S2.** SEM (a) and EDS (b–d) images of Ni–Co–O.

**Citation:** Luo, Y.; Feng, X.; Wei, D.; Zhang, L.; Wang, Q.; Yang, F.; Qiu, S.; Xu, F.; Zou, Y.; Sun, L.; Chu, H.. Structure-Engineered Core–Shell Ni–Co–O/NiCo-LDH Nanospheres as High-Performance Supercapacitor Electrodes. *Coatings* **2023**, *13*, x. <https://doi.org/10.3390/xxxxx>

Academic Editor: Alicia de Andrés

Received: 21 December 2022

Revised: 14 January 2023

Accepted: 21 January 2023

Published: 3 February 2023

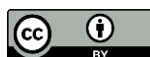

**Copyright:** © 2023 by the authors. Submitted for possible open access publication under the terms and conditions of the Creative Commons Attribution (CC BY) license (<https://creativecommons.org/licenses/by/4.0/>).

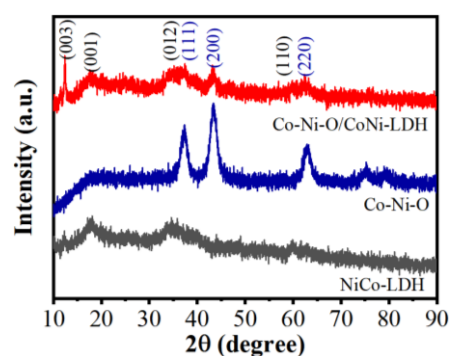

Figure S3. XRD patterns of NiCo-LDH, Ni-Co-O and Ni-Co-O/NiCo-LDH composite.

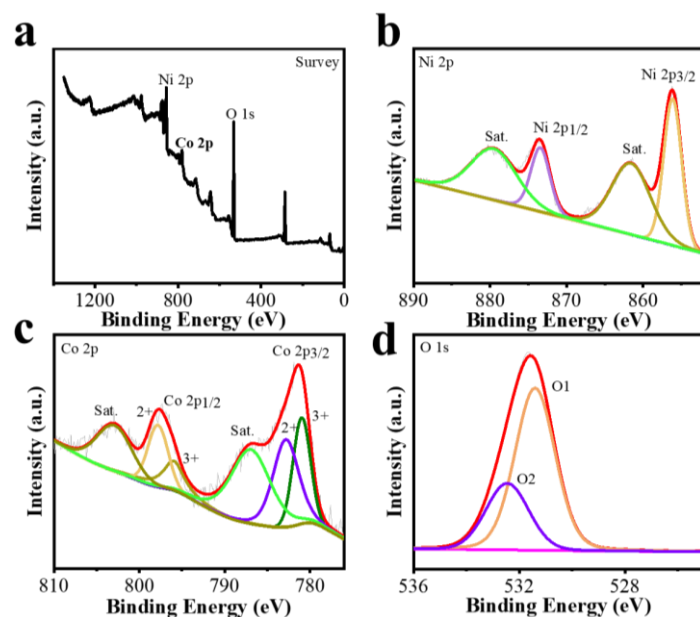

Figure S4. XPS survey spectrum (a), high-resolution spectra of Ni 2p (b), Co 2p (c), O 1s (d) for NiCo-LDH.

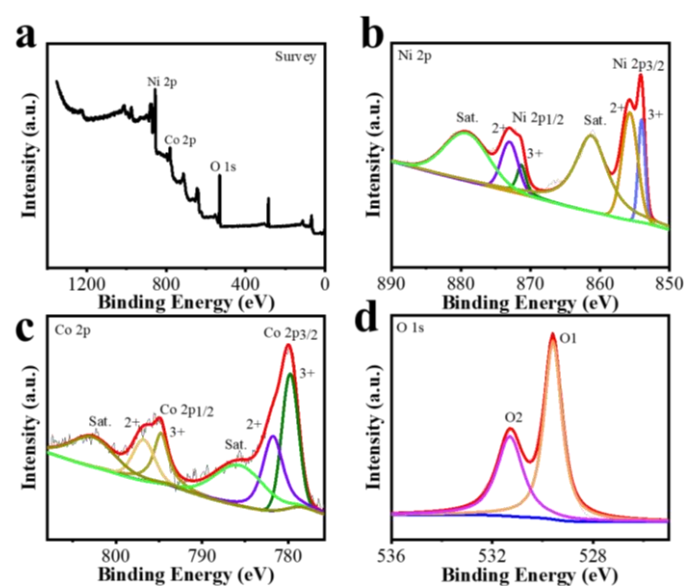

Figure S5. XPS survey spectrum (a), high-resolution spectra of Ni 2p (b), Co 2p (c), O 1s (d) for Ni-Co-O.

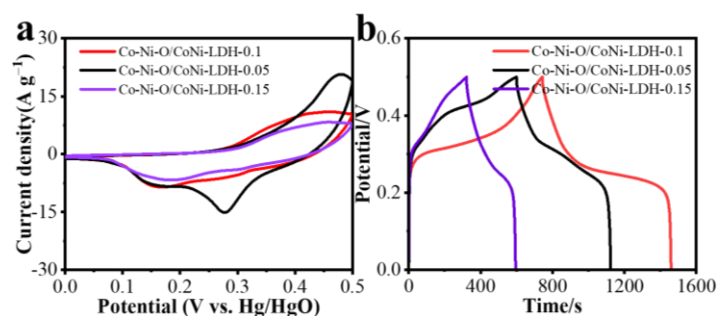

Figure S6. CV (a) and GCD (b) curves of different ratio of the two components of the Ni-Co-O/NiCo-LDH composite.

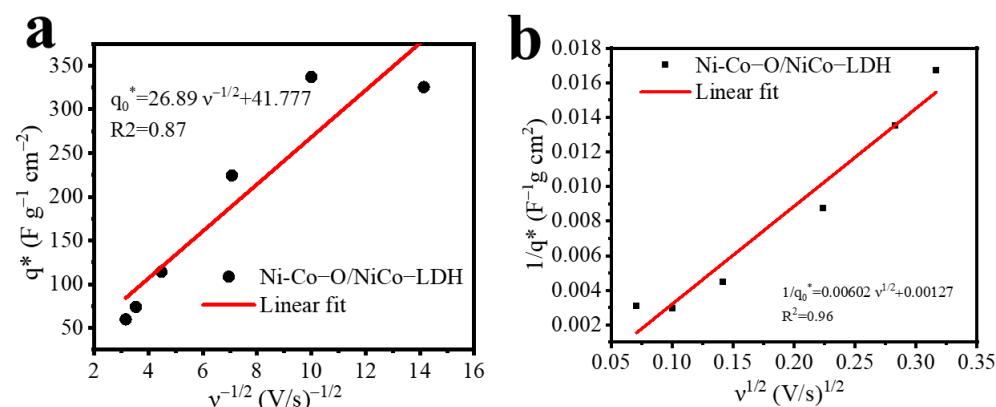

Figure S7. (a) a linear fit of capacity ( $q$ ) vs. reciprocal of square root of scan rate ( $v^{-1/2}$ ) of Ni-Co-O/NiCo-LDH, (b) linear fit of reciprocal of capacity ( $q^{-1}$ ) vs. square root of scan rate ( $v^{1/2}$ ) of Ni-Co-O/NiCo-LDH.

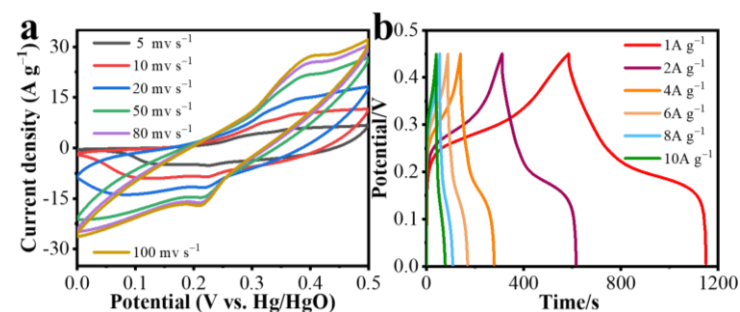

Figure S8. (a) CV and (b) GCD curves of NiCo-LDH.

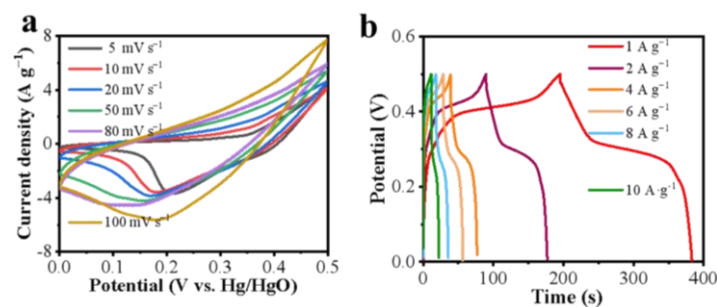

Figure S9. (a) CV and (b) GCD curves of Ni-Co-O.

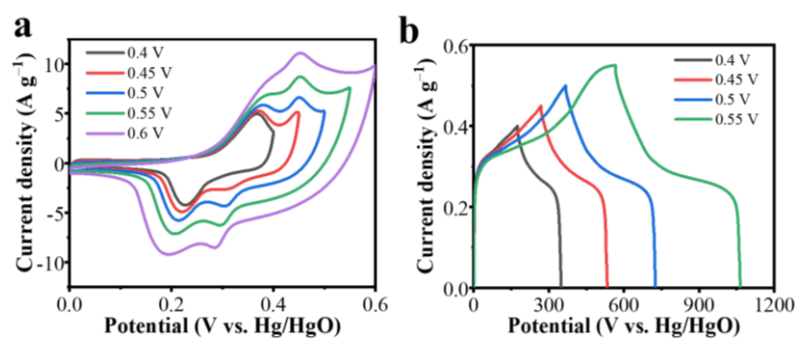

Figure S10. (a) CV and (b) GCD curves of Ni-Co-O/NiCo-LDH composite under different potential window.

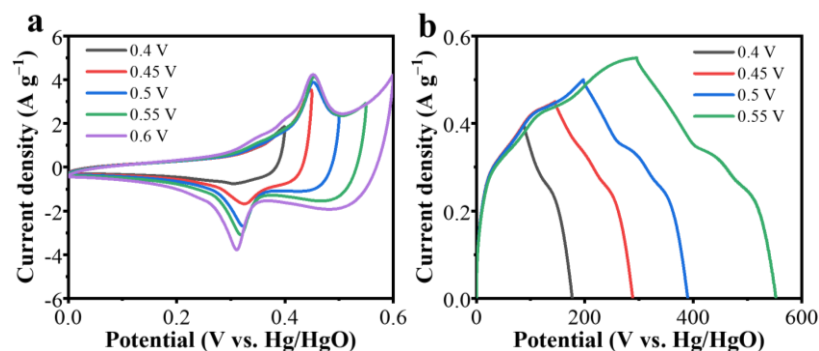

Figure S11. (a) CV and (b) GCD curves of Ni-Co-O under different potential window.

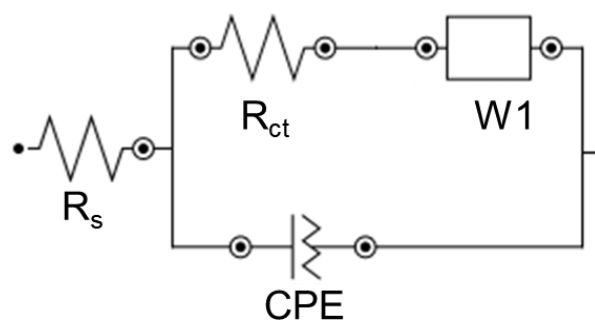

Figure S12. The equivalent circuit of EIS data fitting.

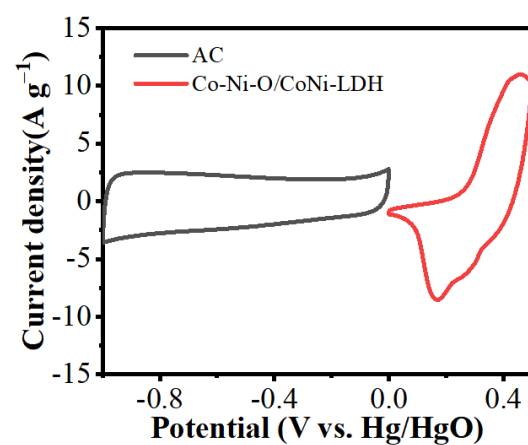

Figure S13. CV curves of Ni-Co-O/NiCo-LDH electrodes (0–0.5 V) and AC/NF electrodes (−1.0–0 V) at a scan rate of  $10 mV s^{-1}$ .

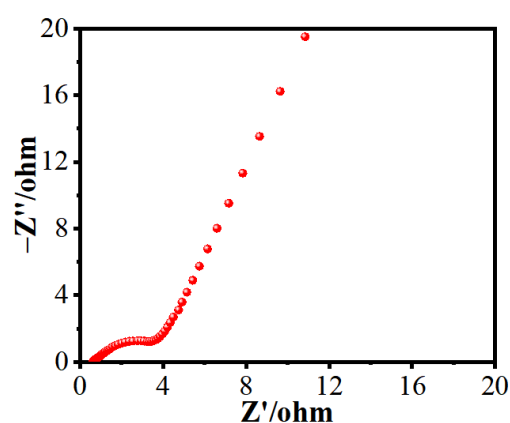

Figure S14. EIS of Ni-Co-O/NiCo-LDH//AC device.

Table S1. The  $R_{ct}$  and  $R_s$  of different samples.  $R_s$  related to the series resistance and  $R_{ct}$  denotes the charge transfer resistance.

| Electrode        | $R_s$ ( $\Omega$ ) | $R_{ct}$ ( $\Omega$ ) |
|------------------|--------------------|-----------------------|
| NiCo-LDH         | 0.24               | 1.56                  |
| Ni-Co-O          | 0.77               | 0.96                  |
| Ni-Co-O/NiCo-LDH | 0.24               | 1.06                  |

Table S2. Comparison of electrochemical properties of NiCo-LDH/Ni-Co-O electrode with other literatures.

| Positive Electrode                                                    | Negative Electrode                | Capacity (Positive Electrode)                     | Capacity (Device) | Energy Density (Wh/kg) | Power Density (W/kg) | Ref.      |
|-----------------------------------------------------------------------|-----------------------------------|---------------------------------------------------|-------------------|------------------------|----------------------|-----------|
| $\text{CuCo}_2\text{O}_4@\text{Co}(\text{OH})_2$                      | AG                                | 424 F/g at 0.5 A/g                                | 70 F/g at 0.5 A/g | 19.2                   | 350                  | [39]      |
| $\text{CuCo}_2\text{O}_4@\text{Ni}_{0.5}\text{Co}_{0.5}(\text{OH})_2$ | AC                                | 295.6 mAh/g at 1 A/g                              | 90 F/g at 1 A/g   | 32                     | 800                  | [43]      |
| $\text{ZnCo}_2\text{O}_4@\text{Ni}_x\text{Co}_{2x}(\text{OH})_{6x}$   | AC                                | 419.1 mAh/cm <sup>2</sup> at 5 mA/cm <sup>2</sup> | —                 | 26.2                   | 511.8                | [44]      |
| CN-GLS                                                                | CN-GLS                            | 294 F/g at 0.5 A/g                                | —                 | 17.0                   | 225                  | [45]      |
| Vanadium nitride/Porous carbon                                        | $\text{Ti}_3\text{C}_2\text{T}_x$ | 283 F/g at 0.5 A/g                                | 105 F/g at 1 A/g  | 12.8                   | 985.8                | [46]      |
| $\text{Co}_3\text{O}_4/\text{SiO}_2$                                  | —                                 | 679 at 1 A/g                                      | —                 | —                      | —                    | [47]      |
| Ni-Co-O/NiCo-LDH                                                      | AC                                | 1434 F/g at 1 A/g                                 | 72.5 F/g at 1 A/g | 26                     | 807                  | This work |

**Disclaimer/Publisher's Note:** The statements, opinions and data contained in all publications are solely those of the individual author(s) and contributor(s) and not of MDPI and/or the editor(s). MDPI and/or the editor(s) disclaim responsibility for any injury to people or property resulting from any ideas, methods, instructions or products referred to in the content.
